# Supplementary material for: Highly active and stable cobalt catalysts with a tungsten carbide-activated carbon support for dry reforming of methane: effect of the different promoters
Source: Royal Society of Chemistry journal article supplement (doi:10.1039/d2cy00833e), 2022-01-01
Supplement: d2cy00833e1.pdf [file d2cy00833e1.pdf]

## Supplementary information

### Highly active and stable cobalt catalysts with tungsten carbide-activated carbon support for dry reforming methane: Effect of the different promoters

Yu Zhang <sup>1,2</sup>, Zhoujie Liang <sup>1,2</sup>, Guojie Zhang <sup>1,2,\*</sup>, Jun Liu <sup>3,4</sup>, Ying Wang <sup>1,2</sup>,

Yuqing Zhao <sup>1,2</sup>, Guoqiang Li <sup>1,2</sup>, Yongkang Lv <sup>1,2,\*</sup>

<sup>1</sup> State Key Laboratory of Clean and Efficient Coal Utilization, Taiyuan University of Technology, Taiyuan, 030024, Shanxi, P. R. China

<sup>2</sup> Key Laboratory of Coal Science and Technology, Ministry of Education, Taiyuan University of Technology, Taiyuan, 030024, Shanxi, P. R. China

<sup>3</sup> College of Chemistry and Chemical Engineering, Taiyuan University of Technology, Taiyuan, Shanxi, 030024 P. R. China

<sup>4</sup> National Engineering Laboratory for Multi Flue Gas Pollution Control Technology and Equipment, School of Environment, Tsinghua University, Beijing 100084, China

\* Corresponding author's E-mail: [zhgidoc@126.com](mailto:zhgidoc@126.com) (G Zhang)

[lykang@tyut.edu.cn](mailto:lykang@tyut.edu.cn) (Y Lv)

## Catalyst characterization

The crystal phases of catalyst were studied by XRD analysis using Ultima IV diffractometer equipped with Cu K $\alpha$  radiation. The data was obtained in the range of 20-80 ° with 5 °/min. The crystal size was calculated according to Scherer equation (Eq. S1)

The loading of Co was quantitatively determined by inductively coupled plasma optical emission spectroscopy (ICP-OES Agilent 5110)

XPS analysis of the catalyst was performed using a Thermo Scientific K-Alpha X-ray photoelectronic spectrometer. Al K $\alpha$  radiation ( $h\nu=1486.6$  eV, pass energy=50 eV) was regarded as the excitation source in an ultra-vacuum environment ( $8\times 10^{-10}$  Pa). The spectral peaks of all samples were standardized with a C 1s peak at 284.8 eV.

H<sub>2</sub> temperature-programmed reduction (H<sub>2</sub>-TPR), H<sub>2</sub> temperature-programmed desorption (H<sub>2</sub>-TPD) were performed using a VDSorb-91x instrument equipped with a thermal conductivity detector (TCD). Before H<sub>2</sub>-TPR experiment, 50 mg catalyst sample was pretreated in Ar atmosphere at 300 °C for 30 min. Then, the sample was cooled to 50 °C. Then, the material was heated to 900 °C at a ramp rate 10 °C/min under 10 vol.% H<sub>2</sub>/Ar atmosphere. The H<sub>2</sub> emanative signal was tested online by TCD. The reduction degree of active metal Co is calculated by quantifying the consumption of H<sub>2</sub> (Eq. S2). Before H<sub>2</sub>-TPD experiment, 50 mg catalyst sample was heated to 600 °C at a ramp rate 10 °C/min under 5 vol.% H<sub>2</sub>/Ar atmosphere (30 ml/min), and maintain 60 min for prereduction. Then, the sample was cooled to 50 °C. Subsequently, a 60 mL·min<sup>-1</sup> H<sub>2</sub> chemisorption pulse was carried out at 10 vol.% H<sub>2</sub>/Ar (30 mL·min<sup>-1</sup>). Finally, the sample was heated to 900 °C at a ramp rate 10 °C/min for H<sub>2</sub> desorption. The H<sub>2</sub> emanative signal was tested online by TCD. The dispersion, specific surface area and crystal size of active metal Co can be calculated by H<sub>2</sub> desorption. (Eq. S3-S5)

TG analysis of the catalyst was performed using a TGA 5500 instrument. 6 mg catalyst was placed in a ceramic crucible. Then, the sample was heated to 900 °C at a heating rate of 10 °C/min in air atmosphere (100 ml/min), meanwhile, the quality variations of catalyst sample were recorded.

The particle size and morphology of catalyst was studied by TEM under a working voltage of 200Kv (Tecnai G2 F30, FEI). The test sample was first ground into fine powder then dispersed into an ethanol solution. The sample was ultrasound for 40 min. Then, adopting the drip tube, the solution was dropped onto the copper mesh.

Subsequently, the sample was dried naturally. Finally, the sample was analyzed.

Physical properties and structural characteristics of catalysts were analyzed by N<sub>2</sub> physical adsorption-desorption experiments using Beishide 3H-2000PS2 apparatus at liquid nitrogen temperature (-196 °C). 0.1 g sample was degassed at 250 °C for 6 h under vacuum to remove water and impurities from the material surface. The specific surface areas were calculated using BET method based on N<sub>2</sub> adsorption curve. The full pore size distribution of the samples was obtained according to the Density Functional Theory (DFT) calculation method.

Infrared analysis of catalyst was performed using Thermo Fisher Is 5 infrared spectrometer. The scanning range was 4000-400 cm<sup>-1</sup>, the resolution was 4 cm<sup>-1</sup>, and the number of scanning samples was 32 times.

## Calculation equations

$$d = \frac{k\lambda}{\beta \cos\theta} \quad \text{Eq. S1}$$

Where d is crystal size, k is shape factor (Spherical or spheroid, k=0.9), λ is the X-ray wavelength (λCu Kα= 0.15418 nm), β is the FWHM of the strongest diffraction peak, and θ is the corresponding diffraction angle.

$$R_{Co}(\%) = \frac{2 \times H_{2,consumption} \times 10^{-6} \times M_{Co}}{m_{Co}} \times 100 \quad \text{Eq. S2}$$

$$D_C(\%) = \frac{2 \times H_{2uptake} \times 10^{-6} \times M_C \times \delta}{m_{Co}} \times 100 \quad \text{Eq. S3}$$

$$S_C(m^2 \cdot g^{-1}) = \frac{2 \times H_{2uptake} \times 10^{-6} \times N_{AV}}{\sigma_{Co}} \times 100 \quad \text{Eq. S4}$$

$$d_C(n) = \frac{96}{D_{Co}} \quad \text{Eq. S5}$$

Where, H<sub>2</sub>uptake is quantitatively measured by H<sub>2</sub>-TPR (μmol·g<sup>-1</sup>). δ is the stoichiometric factor of the Co/H molar ratio in chemical adsorption (1). N<sub>AV</sub> is the Avogadro constant (6.02 × 10<sup>23</sup> mol<sup>-1</sup>). σ<sub>Co</sub> is the average number of surface Co atoms (1.51 × 10<sup>9</sup> at·m<sup>2</sup>).



**Fig.S1**

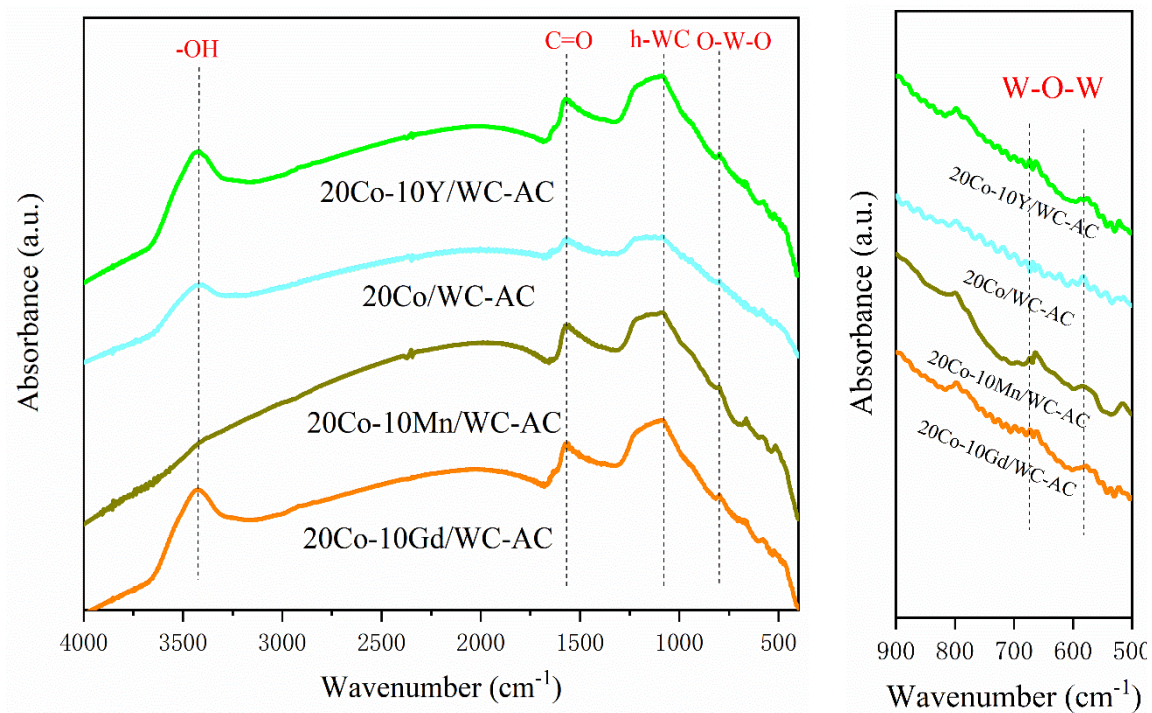

**Fig. S1** FT-IR patterns of catalysts with different promoters

**Fig.S2**

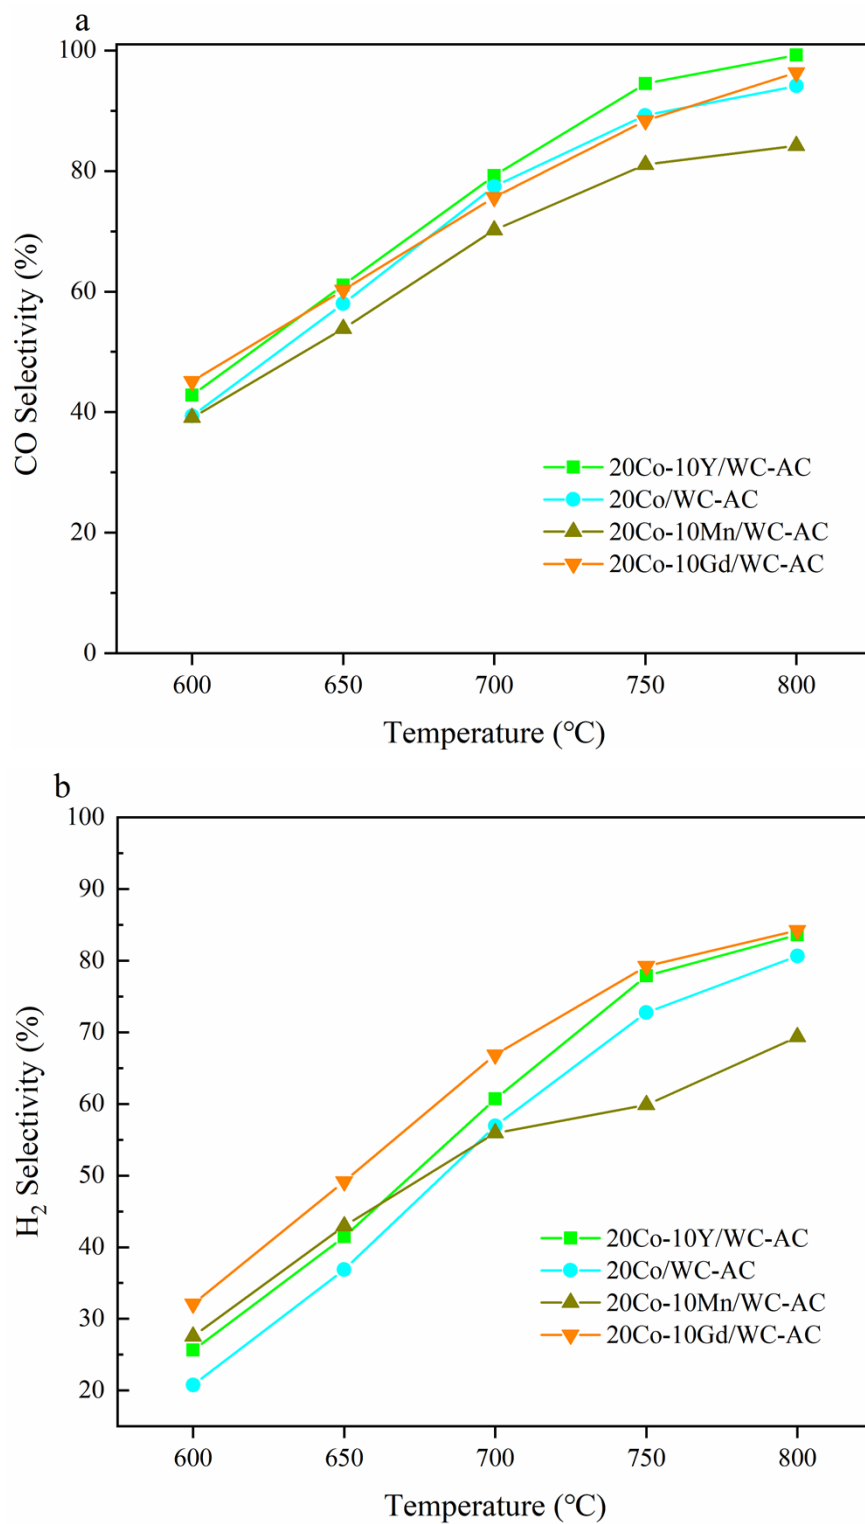

**Fig.S2** The activity test of catalysts with different promoters (a) CO selectivity (b) H<sub>2</sub> selectivity

**Fig.S3**

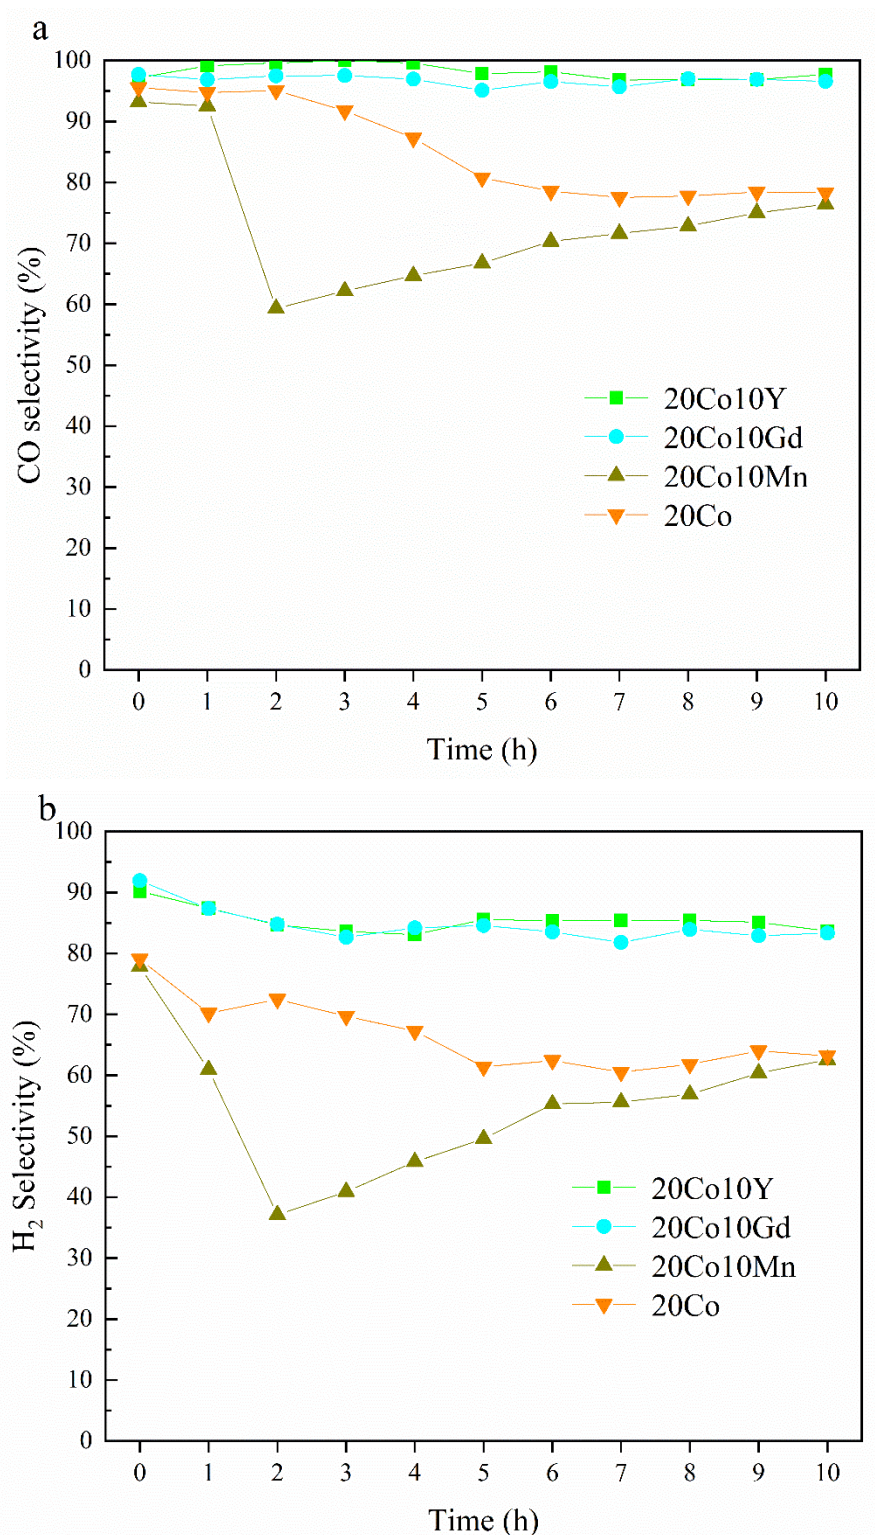

**Fig.S3** The stability test of catalyst modified different promoter (a) CO selectivity (b) H<sub>2</sub> selectivity

**Fig.S4**

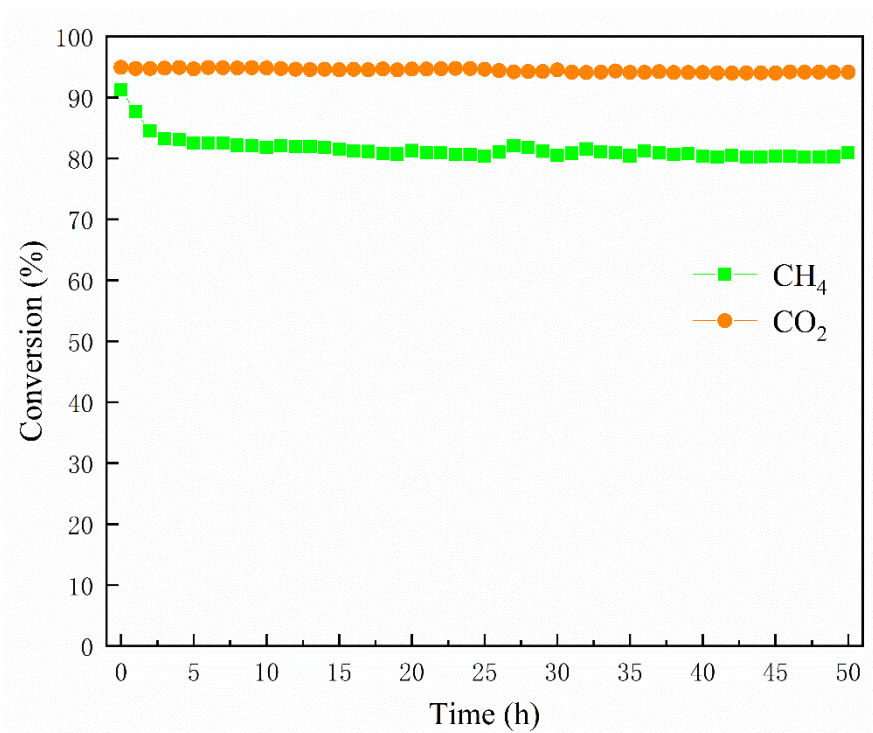

**Fig.S4** The long stability test of Y-modification catalyst



**Fig.S5**

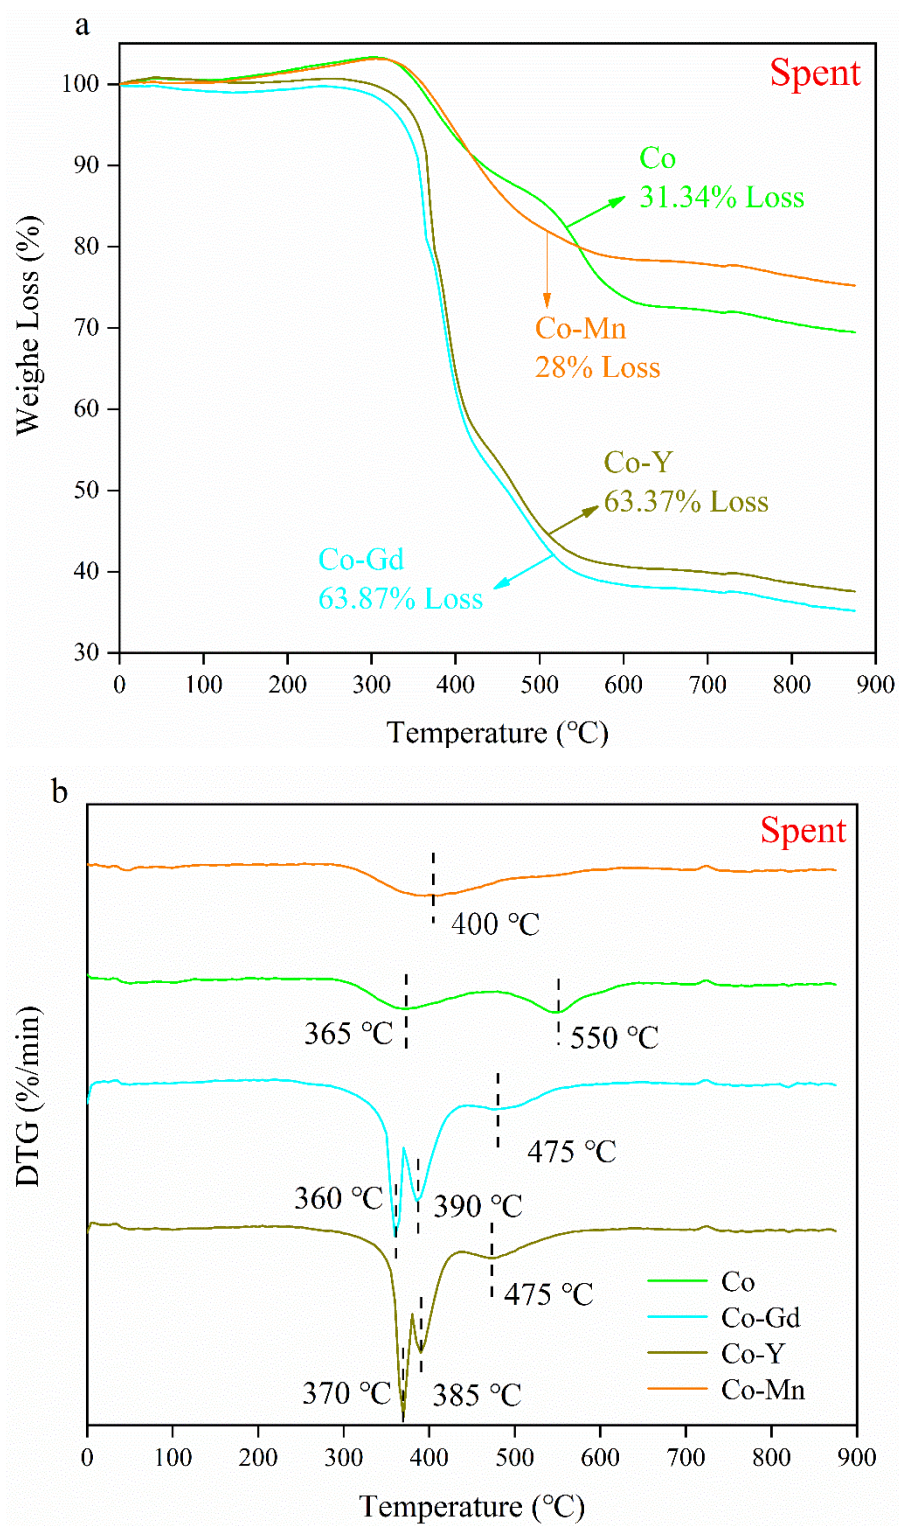

**Fig.S5** (a) TG and (b) DTG profiles of spent catalyst modified different promoter

Fig.S6

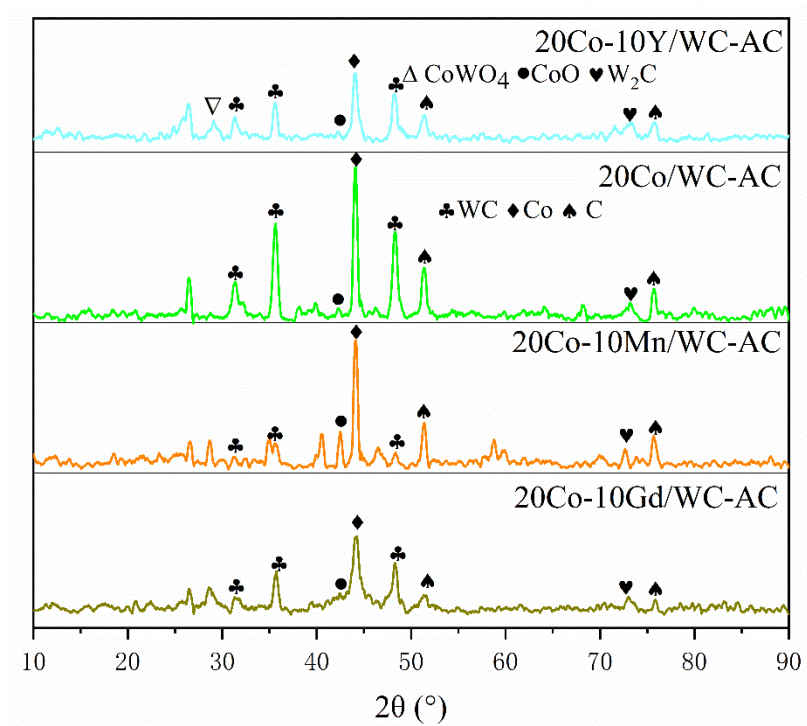

Fig.S6 XRD pattern of spent catalysts modified different promoters

**Table S1****Table S1** Crystal size of Co of the fresh and the spent catalyst with different promoter

| catalyst        | Co Crystal size ( nm ) |       |
|-----------------|------------------------|-------|
|                 | fresh                  | spent |
| 20Co-10Y/WC-AC  | 27                     | 30    |
| 20Co/WC-AC      | 47                     | 71    |
| 20Co-10Mn/WC-AC | 54                     | 80    |
| 20Co-10Gd/WC-AC | 30                     | 45    |
